# Supplementary material for: Thermal decomposition of isolated and crystal 4,10-dinitro-2,6,8,12-tetraoxa-4,10-diazaisowurtzitane according to ab initio molecular dynamics simulations
Source: Royal Society of Chemistry journal article supplement (doi:10.1039/c6ra27255j), 2017-01-01
Supplement: c6ra27255j1.pdf [file c6ra27255j1.pdf]

## Supporting information

Thermal decompositions of isolated and crystalline 4,10-dinitro-2,6,8,12- tetraoxa-4,10- diazaisowurtzite from ab initio molecular dynamics simulations

Dong Xiang, Weihua Zhu

Table S1. Calculated relative energies and entropies of the TEX, intermediates, and transition states.

|                                                      | TEX | TS1  | Int1   | TS2    | Int2   | TS3    | Int3   | TS4    | Int4  | TS5   | TS6    | Int5   |
|------------------------------------------------------|-----|------|--------|--------|--------|--------|--------|--------|-------|-------|--------|--------|
| $\Delta E$ (kcal/mol)                                | 0   | 51.5 | -22.79 | -17.79 | -47.72 | -42.72 | -68.45 | 137.05 | 78.89 | 321.6 | 413.7  | 10.67  |
| $\Delta S$ (Cal·mol <sup>-1</sup> ·K <sup>-1</sup> ) | 0   | 8.77 | 0.51   | -14.63 | -11.45 | -19.21 | -11.45 | -23.79 | 0.52  | -3.07 | -10.64 | -11.45 |

Table S2. Calculated frequencies of the transition states. <sup>a</sup>

| TS1     |         |         |         |         |         |         |         |         |  |
|---------|---------|---------|---------|---------|---------|---------|---------|---------|--|
| -53.02  | 80.52   | 84.62   | 95.13   | 212.40  | 224.89  | 293.43  | 302.35  | 357.35  |  |
| 387.04  | 391.52  | 397.75  | 411.70  | 503.48  | 569.97  | 594.73  | 627.56  | 642.50  |  |
| 664.03  | 730.02  | 732.30  | 776.37  | 792.31  | 802.61  | 819.48  | 846.96  | 854.01  |  |
| 864.12  | 903.61  | 943.59  | 969.21  | 983.94  | 1003.74 | 1009.69 | 1011.80 | 1032.42 |  |
| 1052.83 | 1054.40 | 1078.39 | 1135.61 | 1142.99 | 1181.51 | 1221.44 | 1270.01 | 1276.58 |  |
| 1277.29 | 1317.46 | 1317.65 | 1334.07 | 1342.63 | 1360.46 | 1363.54 | 1373.58 | 1374.34 |  |
| 1377.55 | 1392.60 | 1432.92 | 1433.38 | 1736.91 | 1737.33 | 3139.84 | 3151.52 | 3202.69 |  |
| 3203.25 | 3208.25 | 3209.27 |         |         |         |         |         |         |  |
| TS2     |         |         |         |         |         |         |         |         |  |
| -114.17 | 103.88  | 164.80  | 267.25  | 318.56  | 341.20  | 351.89  | 403.14  | 412.32  |  |
| 443.19  | 457.65  | 483.09  | 624.24  | 652.64  | 654.47  | 713.98  | 737.37  | 760.18  |  |
| 783.64  | 808.11  | 811.22  | 812.21  | 835.39  | 852.12  | 905.50  | 928.55  | 931.78  |  |
| 962.32  | 968.67  | 982.31  | 1001.71 | 1023.57 | 1095.11 | 1100.59 | 1132.38 | 1147.67 |  |
| 1206.87 | 1252.84 | 1268.18 | 1270.76 | 1274.89 | 1326.49 | 1330.74 | 1337.85 | 1346.64 |  |
| 1350.51 | 1366.53 | 1377.85 | 1385.03 | 1420.49 | 1653.46 | 3121.68 | 3122.37 | 3123.32 |  |
| 3130.11 | 3130.94 | 3136.14 |         |         |         |         |         |         |  |
| TS3     |         |         |         |         |         |         |         |         |  |
| -317.85 | 47.02   | 57.10   | 69.40   | 88.81   | 119.63  | 219.87  | 244.76  | 270.91  |  |
| 305.3   | 337.81  | 369.31  | 422.29  | 427.01  | 475.29  | 517.39  | 556.76  | 571.26  |  |
| 606.43  | 661.87  | 678.51  | 704.81  | 719.57  | 751.87  | 762.38  | 767.29  | 794.07  |  |
| 801.68  | 807.94  | 831.72  | 862.65  | 888.67  | 928.00  | 939.97  | 943.21  | 978.89  |  |
| 987.92  | 1003.99 | 1048.70 | 1064.85 | 1089.41 | 1133.81 | 1200.20 | 1216.39 | 1244.76 |  |
| 1254.65 | 1259.75 | 1280.85 | 1282.35 | 1291.84 | 1314.60 | 1317.75 | 1340.25 | 1344.37 |  |
| 1357.70 | 1357.79 | 1411.72 | 1428.14 | 1536.56 | 1652.95 | 3090.99 | 3114.49 | 3118.45 |  |
| 3185.12 | 3194.46 | 3262.75 |         |         |         |         |         |         |  |
| TS4     |         |         |         |         |         |         |         |         |  |
| -442.72 | 233.93  | 245.97  | 290.24  | 352.90  | 359.16  | 366.58  | 426.94  | 475.47  |  |
| 560.61  | 581.72  | 663.12  | 673.57  | 716.97  | 723.22  | 748.89  | 824.45  | 855.92  |  |

|         |         |         |         |         |         |         |         |         |
|---------|---------|---------|---------|---------|---------|---------|---------|---------|
| 863.01  | 881.64  | 881.84  | 887.81  | 950.86  | 975.48  | 1013.15 | 1013.32 | 1035.70 |
| 1049.23 | 1116.23 | 1172.19 | 1230.33 | 1267.82 | 1350.82 | 1355.57 | 1362.09 | 1377.47 |
| 1387.28 | 1404.58 | 1443.41 | 1448.79 | 1482.28 | 1596.48 | 3122.07 | 3136.57 | 3202.32 |
| 3203.29 | 3207.07 | 3210.70 |         |         |         |         |         |         |
| TS5     |         |         |         |         |         |         |         |         |
| -95.43  | 61.14   | 81.33   | 114.19  | 170.82  | 217.08  | 264.63  | 286.64  | 343.97  |
| 370.73  | 375.42  | 400.15  | 438.36  | 462.81  | 498.72  | 597.40  | 600.36  | 663.58  |
| 701.83  | 721.48  | 730.70  | 758.19  | 773.67  | 798.17  | 810.01  | 838.91  | 843.41  |
| 844.11  | 890.22  | 913.81  | 938.61  | 939.12  | 945.77  | 970.72  | 978.21  | 986.48  |
| 999.04  | 1009.39 | 1035.14 | 1102.18 | 1113.64 | 1139.53 | 1170.60 | 1228.62 | 1274.51 |
| 1280.25 | 1300.84 | 1305.60 | 1316.83 | 1337.29 | 1346.63 | 1347.32 | 1351.66 | 1358.56 |
| 1371.54 | 1382.80 | 1414.42 | 1421.07 | 1648.38 | 1668.89 | 3128.37 | 3136.21 | 3136.44 |
| 3140.53 | 3186.66 | 3187.79 |         |         |         |         |         |         |
| TS6     |         |         |         |         |         |         |         |         |
| -424.67 | 57.31   | 83.80   | 212.93  | 300.57  | 330.90  | 352.03  | 368.14  | 395.33  |
| 431.56  | 454.98  | 473.91  | 535.80  | 586.51  | 622.83  | 628.71  | 709.01  | 730.61  |
| 748.53  | 758.38  | 798.91  | 812.65  | 838.01  | 847.76  | 866.51  | 902.14  | 926.34  |
| 938.83  | 965.86  | 975.66  | 1016.53 | 1024.74 | 1047.68 | 1072.63 | 1125.27 | 1143.12 |
| 1185.88 | 1229.15 | 1271.81 | 1285.66 | 1296.13 | 1335.29 | 1340.40 | 1346.80 | 1359.29 |
| 1370.86 | 1379.50 | 1392.94 | 1427.07 | 1458.06 | 1626.80 | 3125.63 | 3132.00 | 3140.72 |
| 3173.80 | 3191.28 | 3236.82 |         |         |         |         |         |         |

<sup>a</sup> All frequencies are in  $\text{cm}^{-1}$  and the negative numbers indicate imaginary frequencies.

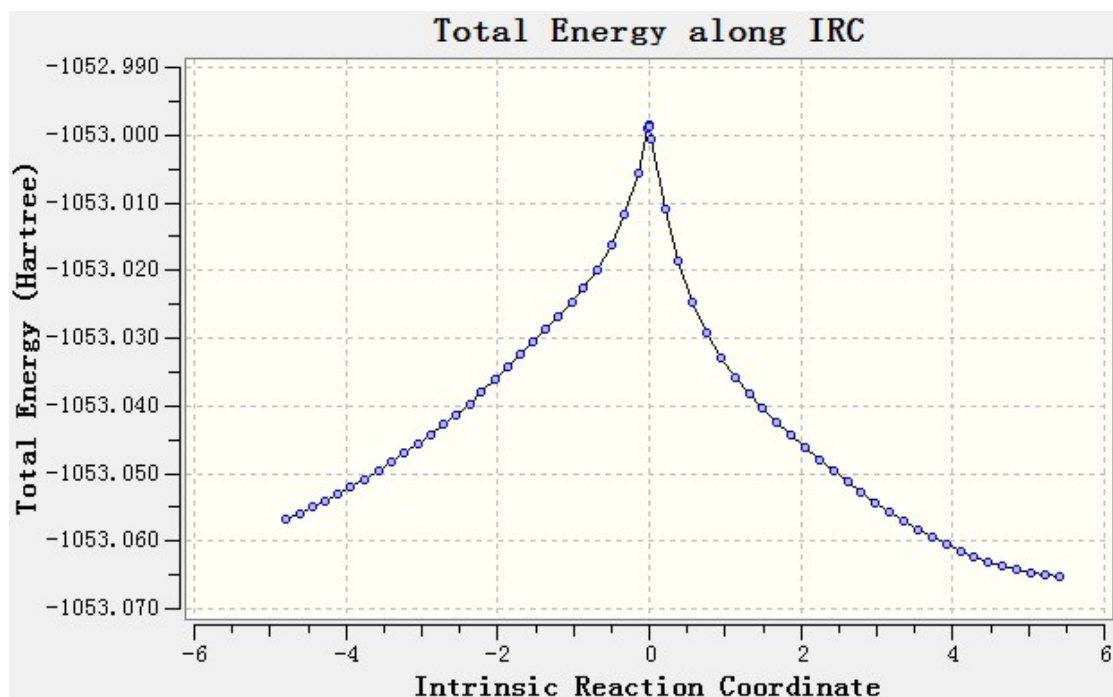

TS2

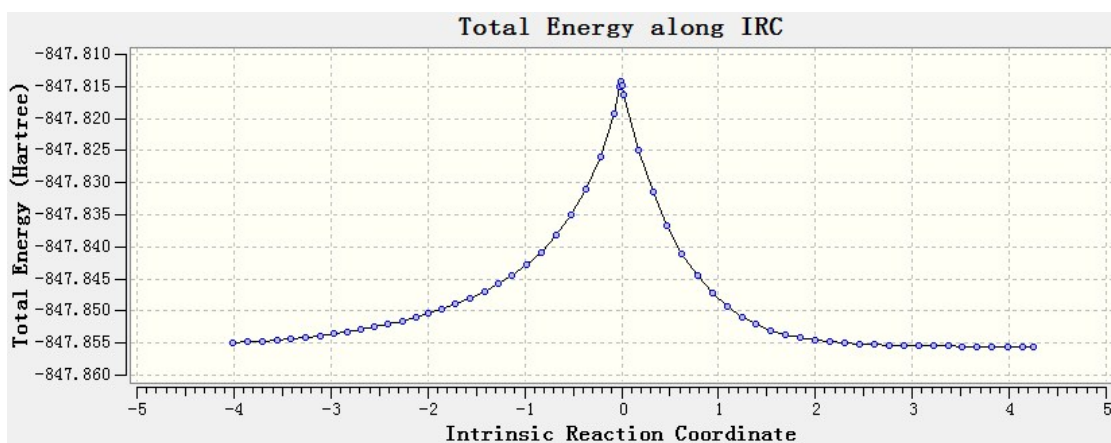

TS3

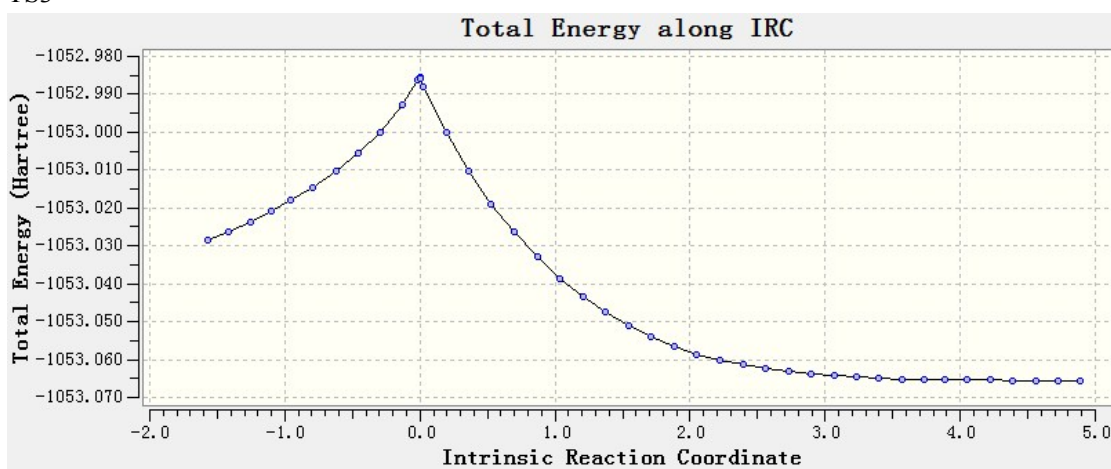

TS4

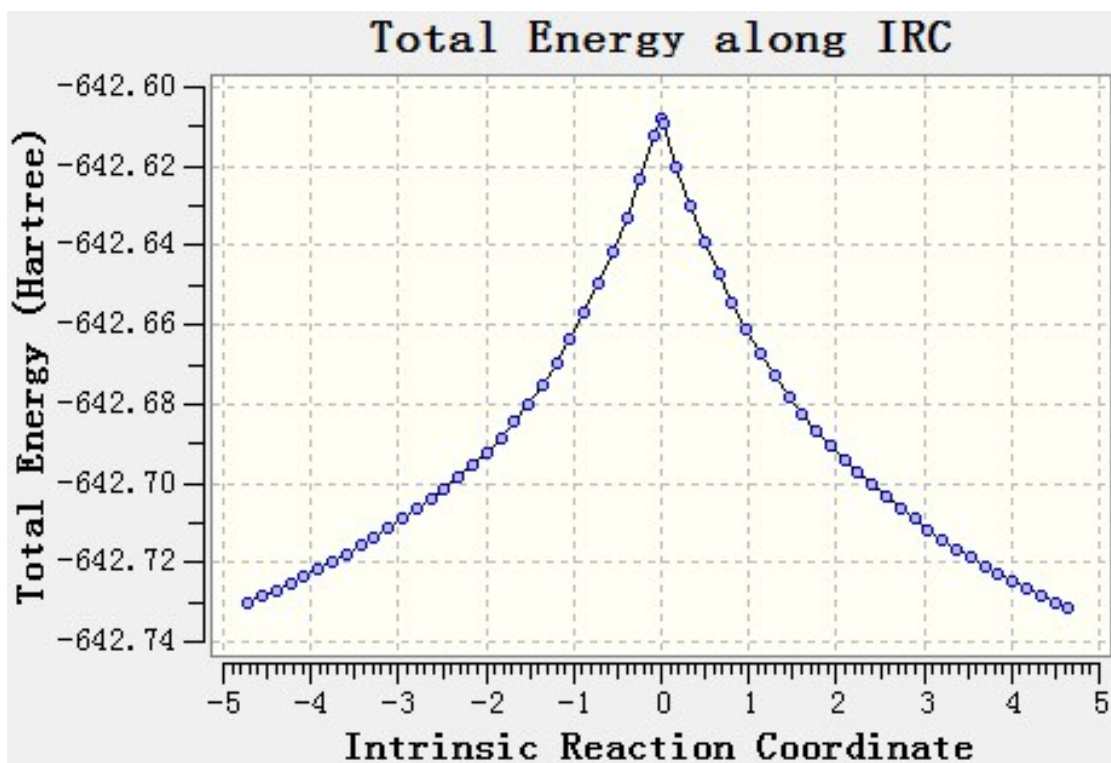

TS5

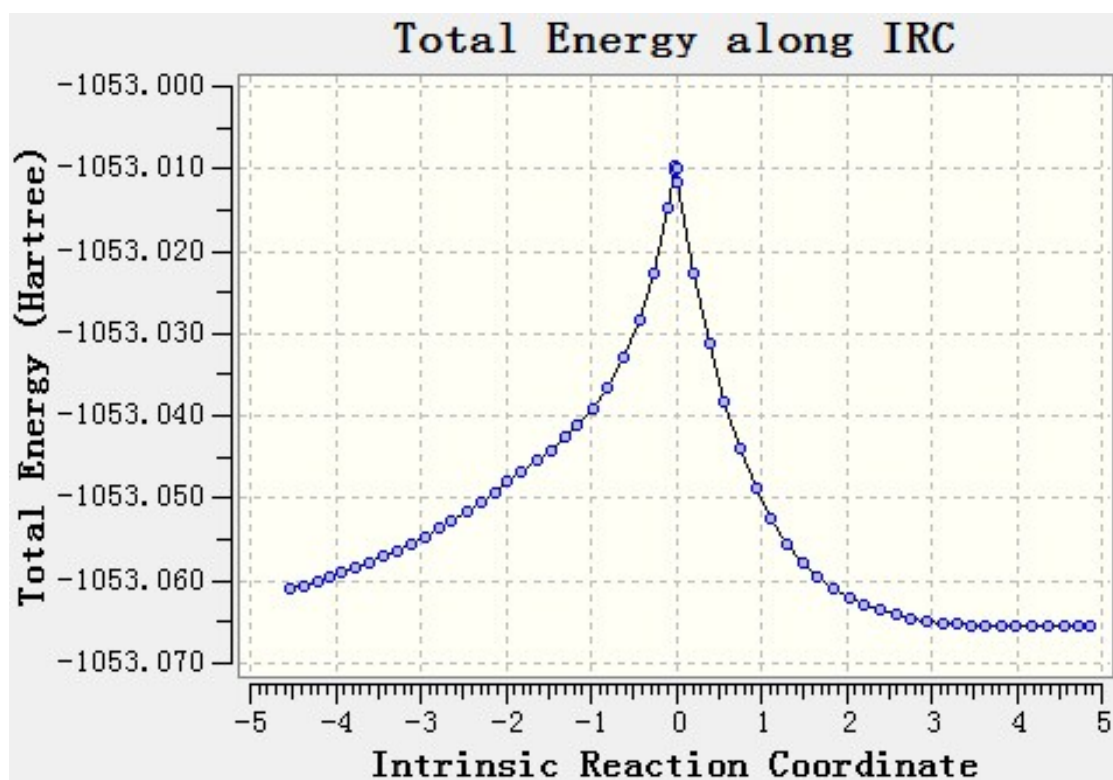

TS6

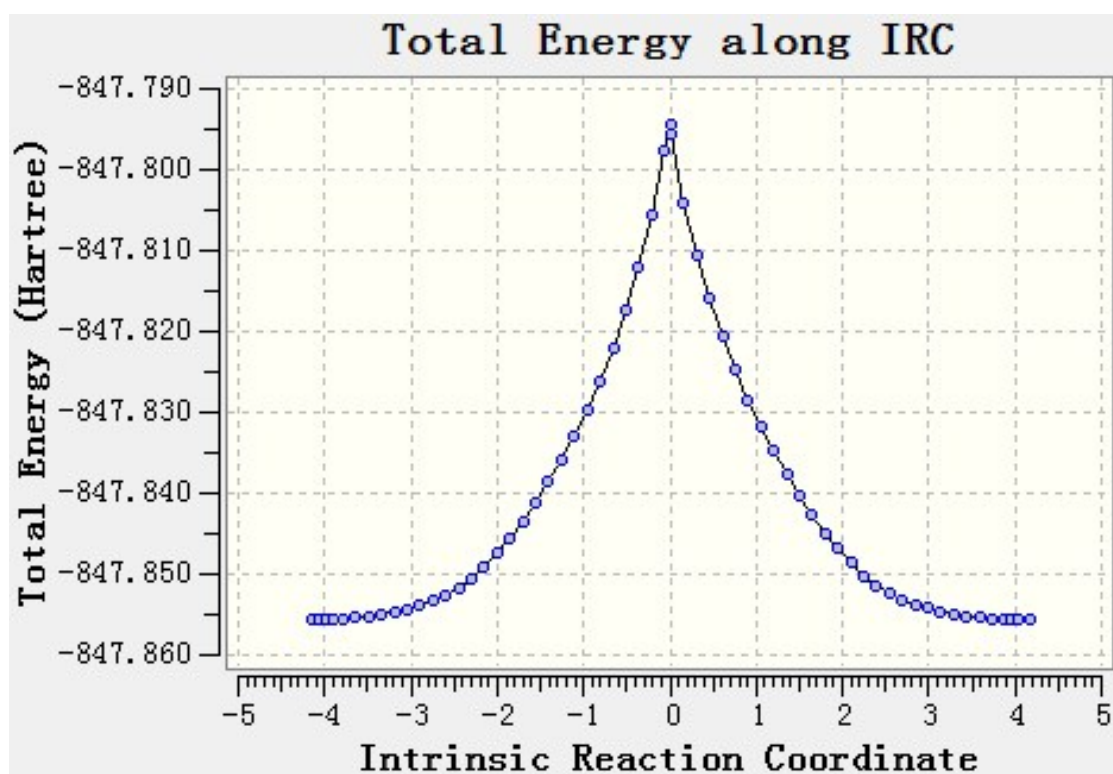

Figure S1. The IRC calculation results of the transition states.
